# Supplementary material for: Expression Profiling of Glucosinolate Biosynthetic Genes in Brassica oleracea L. var. capitata Inbred Lines Reveals Their Association with Glucosinolate Content
Source: MDPI journal article supplement (doi:10.3390/molecules21060787), 2016-06-17
Supplement: s1 [file s1]

# Supplementary Materials: Expression Profiling of Glucosinolate Biosynthetic Genes in *Brassica Oleracea* L. var. *Capitata* Inbred Lines Reveals Their Association with Glucosinolate Content

Arif Hasan Khan Robin, Go-eun Yi, Rawnak Laila, Kiwoung Yang, Jong-In Park, HyeRan Kim and Ill-Sup Nou

**Table S1.** A list of glucosinolate compounds and their intermediaries with their chemical structure names, trivial names and different abbreviations used.

| Common Name                      | Chemical Name                           | Abbreviations |
|----------------------------------|-----------------------------------------|---------------|
| Glucorucic acid (GER)            | 4-(methylsulfonyl)butyl glucosinolate   | 4MTB          |
| Glucoraphanin (GRA)              | 4-(methylsulfinyl)butyl glucosinolate   | 4MSOB         |
| Sinigrin (SIN)                   | allyl glucosinolate                     | 3PREY         |
| Gluconapin (GNA)                 | 3-butenylglucosinolate                  | 3BTEY         |
| Progoitrin (PRO)                 | 4-hydroxybutyl glucosinolate            | 4OHB          |
| 4-hydroxy-glucobrassicin (4HGBS) | 4-hydroxy 3-Indolylmethyl glucosinolate | 4OHI3M        |
| Neoglucobrassicin (NGBS)         | 1-methoxy-3-indolylmethyl glucosinolate | 1MOI3M        |
| 4-methoxy Glucobrassicin (MGBS)  | 4-methoxy-3-indolylmethyl glucosinolate | 4MOI3M        |

**Table S2.** *p* values indicating statistically significant variation between four cabbage lines in glucosinolate biosynthesis related gene expression level.

| Gene Name                                     | Accession Number | <i>p</i> (Genotype) |
|-----------------------------------------------|------------------|---------------------|
| Transcription factor related genes (19 genes) |                  |                     |
| MYB28                                         | Bol007795        | <0.001              |
|                                               | Bol036286        | <0.001              |
|                                               | Bol017019        | <0.001              |
|                                               | Bol036743        | 0.003               |
| MYB29                                         | Bol008849        | <0.001              |
| MYB34                                         | Bol007760        | <0.001              |
|                                               | Bol017062        | 0.001               |
|                                               | Bol036262        | <0.001              |
| MYB51                                         | Bol013207        | <0.001              |
|                                               | Bol030761        | <0.001              |
| MYB122                                        | Bol026204        | 0.001               |
| Dof1.1                                        | Bol023400        | <0.001              |
| Dof1.1                                        | Bol041144        | <0.001              |
| Dof1.1                                        | Bol006511        | <0.001              |
| IQD1                                          | Bol023096        | <0.001              |
| IQD1                                          | Bol033935        | 0.027               |
| TFL2                                          | Bol021358        | <0.001              |
| TFL2                                          | Bol000201        | <0.001              |
| TFL2                                          | Bol034455        | <0.001              |

Table S2. Cont.

| Gene Name                                       | Accession Number | <i>p</i> (Genotype) |
|-------------------------------------------------|------------------|---------------------|
| Aliphatic biosynthesis related genes (10 genes) |                  |                     |
| <i>ST5b</i>                                     | Bol026201        | <0.001              |
|                                                 | Bol026202        | <0.001              |
| <i>ST5c</i>                                     | Bol030757        | <0.001              |
| <i>FMOGS-OX2</i>                                | Bol010993        | <0.001              |
| <i>FMOGS-OX5</i>                                | Bol029100        | <0.001              |
|                                                 | Bol031350        | <0.001              |
| <i>AOP2</i>                                     | Bo2g102190       | 0.126               |
|                                                 | Bo9g006240       | <0.001              |
| <i>GSL-OH</i>                                   | Bol033373        | <0.001              |
| Indolic biosynthesis related genes (15 genes)   |                  |                     |
| <i>ST5a</i>                                     | Bol026200        | <0.001              |
|                                                 | Bol039395        | 0.037               |
| <i>CYP81F4</i>                                  | Bol032712        | <0.001              |
|                                                 | Bol032714        | <0.001              |
|                                                 | Bol028918        | 0.026               |
| <i>CYP81F1</i>                                  | Bol017375        | <0.001              |
|                                                 | Bol017376        | <0.001              |
|                                                 | Bol028913        | 0.007               |
|                                                 | Bol028914        | <0.001              |
| <i>CYP81F2</i>                                  | Bol012237        | 0.001               |
|                                                 | Bol014239        | <0.001              |
| <i>CYP81F3</i>                                  | Bol028919        | <0.001              |
|                                                 | Bol032711        | <0.001              |
| <i>IGMT1</i>                                    | Bol007029        | 0.005               |
|                                                 | Bol020663        | <0.001              |
| Glucosinolate breakdown related genes (2 genes) |                  |                     |
| <i>TGG1</i>                                     | Bol017328        | <0.001              |
| <i>TGG2</i>                                     | Bol028319        | <0.001              |
|                                                 | Bol025706        | 0.005               |
| <i>TGG5</i>                                     | Bol031599        | 0.002               |
| <i>PEN2</i>                                     | Bol030092        | 0.66                |

Table S3. *p* values indicating statistically significant variation between four cabbage lines for aliphatic and indolic glucosinolate contents.

| Glucosinolate | <i>p</i> (genotype) |
|---------------|---------------------|
| Progoitrin    | <0.001              |
| Glucoraphanin | <0.001              |
| Sinigrin      | <0.001              |
| Gluconapin    | <0.001              |
| Glucoerucin   | 0.113               |
| 4HGBS         | 0.006               |
| MGBS          | 0.029               |
| NGBS          | 0.003               |
| Total         | 0.014               |

**Table S4.** Principal Component analysis for aliphatic and indolic glucosinolate contents and relative expression level of transcription-factor related genes (both aliphatic and indolic) in four cabbage lines of *B. oleracea*. PC, principal component; *p*, statistical significance.

| Variable                | PC1                  | PC2          | PC3          |
|-------------------------|----------------------|--------------|--------------|
| Progoitrin              | 0.16                 | −0.10        | 0.54         |
| Glucoraphanin           | −0.28                | 0.27         | 0.21         |
| Sinigrin                | −0.27                | 0.28         | 0.21         |
| Gluconapin              | −0.28                | 0.26         | 0.20         |
| Glucoerucin             | −0.08                | −0.34        | 0.14         |
| Unidentified            | 0.07                 | −0.44        | 0.21         |
| 4HGBS                   | −0.14                | 0.12         | 0.17         |
| MGBS                    | 0.12                 | −0.33        | −0.05        |
| NGBS                    | 0.08                 | −0.19        | −0.43        |
| <i>Dof1</i> (Bol023400) | 0.35                 | 0.10         | 0.004        |
| <i>Dof1</i> (Bol041144) | 0.30                 | 0.25         | −0.12        |
| <i>Dof1</i> (Bol006511) | 0.29                 | 0.25         | −0.12        |
| <i>IQD1</i> (Bol023096) | 0.19                 | 0.36         | −0.08        |
| <i>IQD1</i> (Bol033935) | 0.23                 | −0.10        | 0.38         |
| <i>TFL2</i> (Bol021358) | 0.32                 | 0.09         | −0.03        |
| <i>TFL2</i> (Bol000201) | 0.32                 | 0.12         | 0.22         |
| <i>TFL2</i> (Bol034455) | 0.31                 | 0.08         | 0.27         |
| %variation explained    | 43.8                 | 22.3         | 13.2         |
| <i>p</i> (genotype)     | <0.001               | <0.001       | <0.001       |
| Genotype                | Mean PC scores (±Sd) |              |              |
| BN3273                  | −3.51 ± 0.39         | 1.66 ± 0.85  | 0.75 ± 0.43  |
| BN3383                  | 3.32 ± 0.34          | 1.69 ± 0.96  | −0.76 ± 0.13 |
| BN4059                  | 1.43 ± 0.78          | −1.31 ± 0.72 | 1.67 ± 1.03  |
| BN4072                  | −1.24 ± 0.62         | −2.04 ± 1.19 | −1.66 ± 1.02 |

**Table S5.** Principal component analysis for indolic glucosinolate contents and relative expression level of biosynthesis related genes in four cabbage lines of *B. oleracea*. PC, principal component; *p*, statistical significance.

| Variable                   | PC1   | PC2   | PC3   |
|----------------------------|-------|-------|-------|
| 4HGBS                      | −0.22 | −0.08 | −0.04 |
| MGBS                       | 0.18  | −0.10 | 0.16  |
| NGBS                       | 0.08  | −0.14 | 0.45  |
| <i>ST5a</i> (Bol026200)    | 0.14  | 0.30  | 0.30  |
| <i>ST5a</i> (Bol039395)    | 0.28  | −0.11 | 0.24  |
| <i>CYP81F1</i> (Bol017376) | 0.01  | −0.36 | 0.26  |
| <i>CYP81F1</i> (Bol017375) | 0.15  | −0.37 | 0.07  |
| <i>CYP81F1</i> (Bol028913) | 0.21  | −0.32 | 0.13  |
| <i>CYP81F1</i> (Bol028914) | 0.30  | 0.01  | −0.37 |
| <i>CYP81F2</i> (Bol012237) | 0.13  | 0.36  | 0.07  |
| <i>CYP81F2</i> (Bol014239) | 0.24  | 0.32  | 0.06  |
| <i>CYP81F3</i> (Bol032711) | 0.02  | 0.25  | 0.44  |
| <i>CYP81F3</i> (Bol028919) | 0.30  | 0.24  | 0.02  |
| <i>CYP81F4</i> (Bol032712) | 0.33  | −0.21 | −0.02 |
| <i>CYP81F4</i> (Bol032714) | 0.30  | 0.24  | 0.05  |
| <i>CYP81F4</i> (Bol028918) | 0.36  | −0.15 | 0.02  |
| <i>IGMT1</i> (Bol007029)   | 0.33  | 0.07  | −0.27 |

Table S5. Cont.

| Variable                 | PC1                        | PC2              | PC3              |
|--------------------------|----------------------------|------------------|------------------|
| <i>IGMT1</i> (Bol020663) | 0.25                       | −0.08            | −0.35            |
| % variation explained    | 35.1                       | 32.5             | 16.6             |
| <i>p</i> (genotype)      | <0.001                     | <0.001           | <0.001           |
| Genotype                 | Mean PC scores ( $\pm$ Sd) |                  |                  |
| BN3273                   | −3.58 $\pm$ 0.18           | 0.51 $\pm$ 0.28  | −1.16 $\pm$ 0.32 |
| BN3383                   | 0.55 $\pm$ 0.77            | 2.91 $\pm$ 0.78  | 1.86 $\pm$ 0.32  |
| BN4059                   | 2.99 $\pm$ 0.65            | 0.11 $\pm$ 0.39  | −1.95 $\pm$ 0.27 |
| BN4072                   | 0.03 $\pm$ 0.98            | −3.53 $\pm$ 0.06 | 1.25 $\pm$ 1.05  |

Table S6. Ct values of three different *actin* genes. Each data is the average of two independent observations.

| Genotype | Biological Replicate | Technical Replicate | Actin 1 | Actin 2 | Actin 3 | Average |
|----------|----------------------|---------------------|---------|---------|---------|---------|
| BN3273   | 1                    | 1                   | 15.2    | 17.5    | 15.2    | 15.9    |
|          | 1                    | 2                   | 15.2    | 17.5    | 15.2    | 15.9    |
|          | 1                    | 3                   | 15.2    | 17.5    | 15.2    | 15.9    |
|          | 2                    | 1                   | 16.9    | 18.6    | 15.4    | 17.0    |
|          | 2                    | 2                   | 16.9    | 18.6    | 15.4    | 17.0    |
|          | 2                    | 3                   | 16.9    | 18.6    | 15.4    | 17.0    |
| BN3383   | 1                    | 1                   | 17.7    | 20.7    | 15.2    | 17.8    |
|          | 1                    | 2                   | 17.7    | 20.7    | 15.2    | 17.8    |
|          | 1                    | 3                   | 17.7    | 20.7    | 15.2    | 17.8    |
|          | 2                    | 1                   | 17.6    | 20.5    | 15.2    | 17.7    |
|          | 2                    | 2                   | 17.6    | 20.5    | 15.2    | 17.7    |
|          | 2                    | 3                   | 17.6    | 20.5    | 15.2    | 17.7    |
| BN4059   | 1                    | 1                   | 18.5    | 17.7    | 16.5    | 17.5    |
|          | 1                    | 2                   | 18.5    | 17.7    | 16.5    | 17.5    |
|          | 1                    | 3                   | 18.5    | 17.7    | 16.5    | 17.5    |
|          | 2                    | 1                   | 20.1    | 19.6    | 16.8    | 18.8    |
|          | 2                    | 2                   | 20.1    | 19.6    | 16.8    | 18.8    |
|          | 2                    | 3                   | 20.1    | 19.6    | 16.8    | 18.8    |
| BN4072   | 1                    | 1                   | 18.8    | 17.7    | 13.7    | 16.7    |
|          | 1                    | 2                   | 18.1    | 17.2    | 13.6    | 16.3    |
|          | 1                    | 3                   | 18.1    | 17.2    | 13.6    | 16.3    |
|          | 2                    | 1                   | 18.1    | 17.2    | 13.6    | 16.3    |
|          | 2                    | 2                   | 18.1    | 17.2    | 13.6    | 16.3    |
|          | 2                    | 3                   | 18.1    | 17.2    | 13.6    | 16.3    |

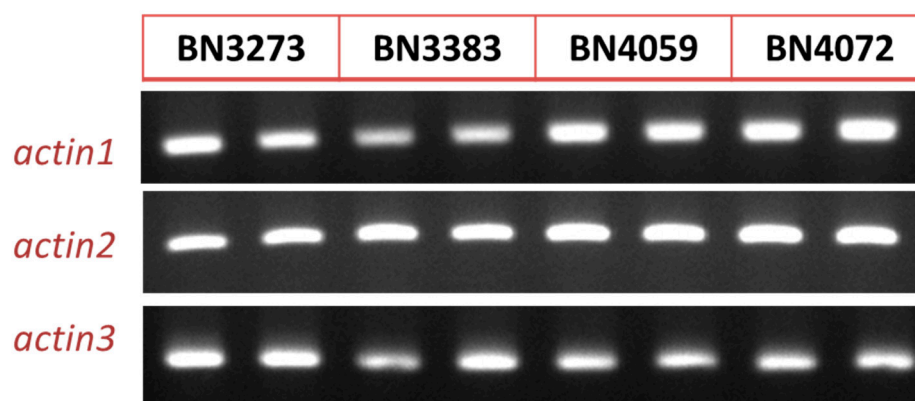

Figure S1. RT-PCR expression level of three actin genes in four cabbage lines.

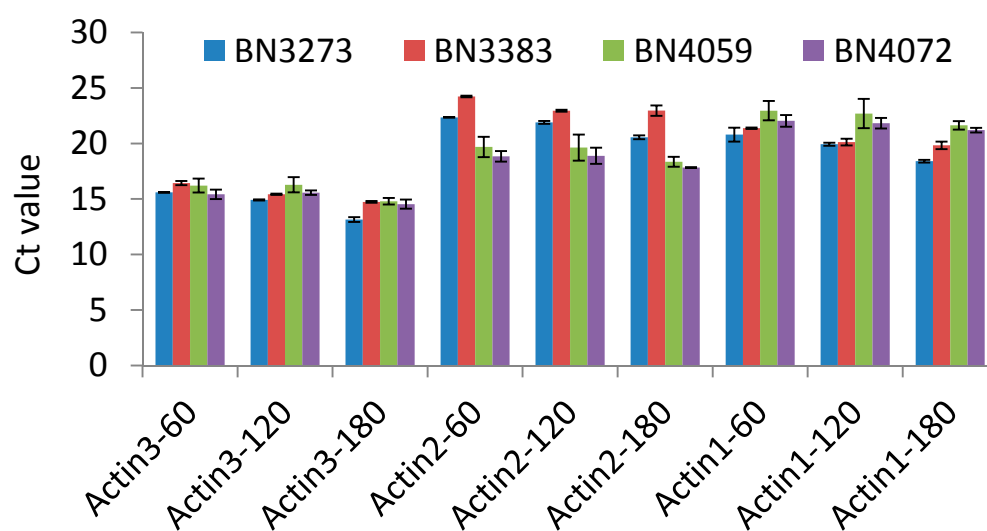

**Figure S2.** The expression level (Ct values) of three reference genes in response to three different concentrations of cDNA (60, 120 and 180 ng  $\mu\text{L}^{-1}$ ) of four genotypes.
